# Supplementary material
Source: publisher site journal article supplement (https://www.dovepress.com/get_supplementary_file.php?f=499161.docx)
Supplement: Supplementary file 1 [file get_supplementary_file.php]

**-Supplementary Materials-**

| **Supplementary Table S1.** List of primers used in this study. | | |
| --- | --- | --- |
| **Primer name** | **Primer sequence 5ʹ–3ʹ** | **Reference** |
| *Actb* Forward | AGCCATGTACGTAGCCATCC | Manuscript reference 39 |
| *Actb* Reverse | CTCTCAGCTGTGGTGGTGAA |
| *Cldn5* Forward | GAACTACGTCTAAGGGCGGG | Manuscript reference 39 |
| *Cldn5* Reverse | ACCCAACCTAACTTGCCTCG |
| *Ocln* Forward | TCATGCCTTGGGGATTGAGC | Manuscript reference 39 |
| *Ocln* Reverse | AGGACTTCCCAGAGTGCAGA |
| *Tnf* Forward | GGGTGATTGGTCCCAACAAG | This work |
| *Tnf* Reverse | GGGTCTGGGCCATGGAA |
| SFB Forward | AGGAGGAGTCTGCGGCACATTAGC | Manuscript reference 39 |
| SFB Reverse | TCCCCACTGCTGCCTCCCGTAG |
| Total bacteria Forward | CGGTGAATACGTTCCCGG | Supplement reference 1 |
| Total bacteria Reverse | TACGGCTACCTTGTTACGACTT |


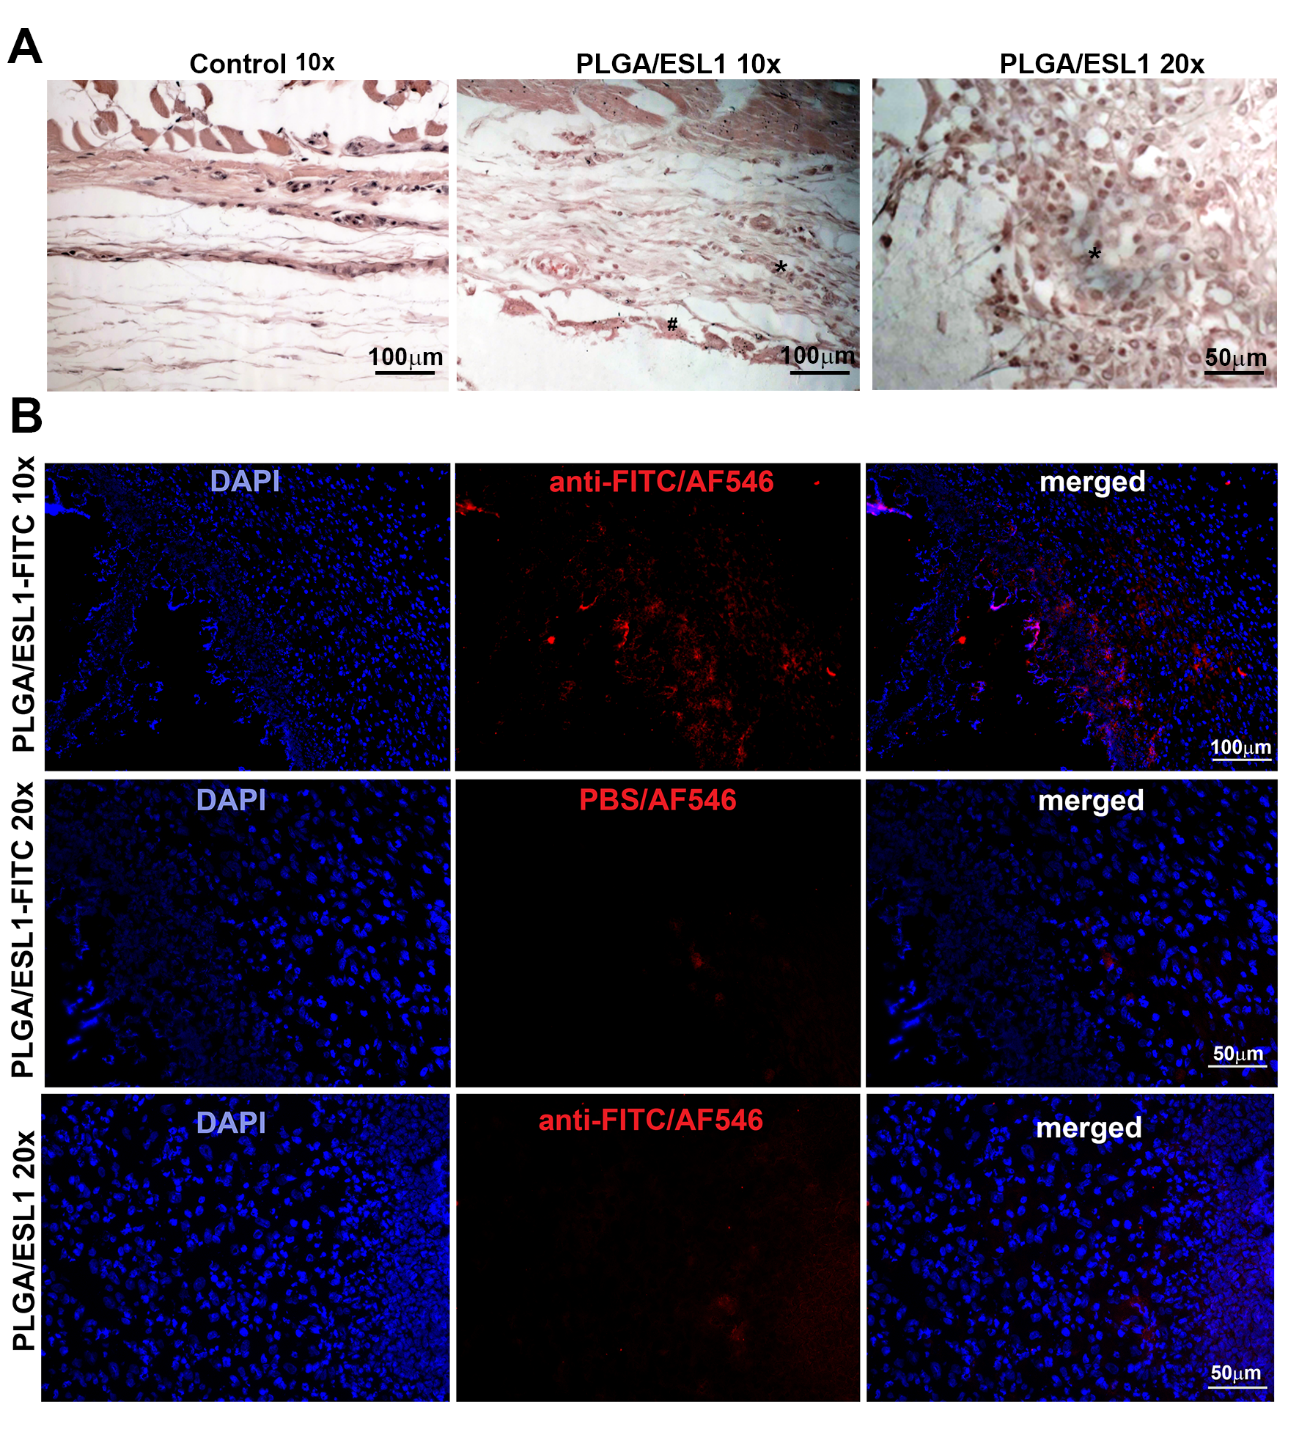


**Supplementary Figure S1. PLGA/ESL1 release in the peri-implant cell infiltrate. A)** H&E staining of skin and subcutaneous tissue of control animals and animals with implanted PLGA/ESL1 in suprascapular region for 4 days, are shown under 10x or 20x times magnification, as indicated. *-immune cell infiltrate #- giant macrophages. **B)** Epi-fluorescent microscopy analyses are shown of the peri-implant region collected 4 days after the implantation of PLGA/ESL1-FITC. The samples were stained with DAPI and with anti-FITC-biotin antibody, followed by streptavidin Alexa Fluor (AF) 546 staining (red) (upper row). Control samples from PLGA/ESL1-FITC animals were stained PBS, following streptavidin AF546 (middle row), and additional controls for the staining were the samples isolated from PLGA/ESL1 animals (non-labelled), and stained with anti-FITC-biotin and streptavidin AF546 (lower row).


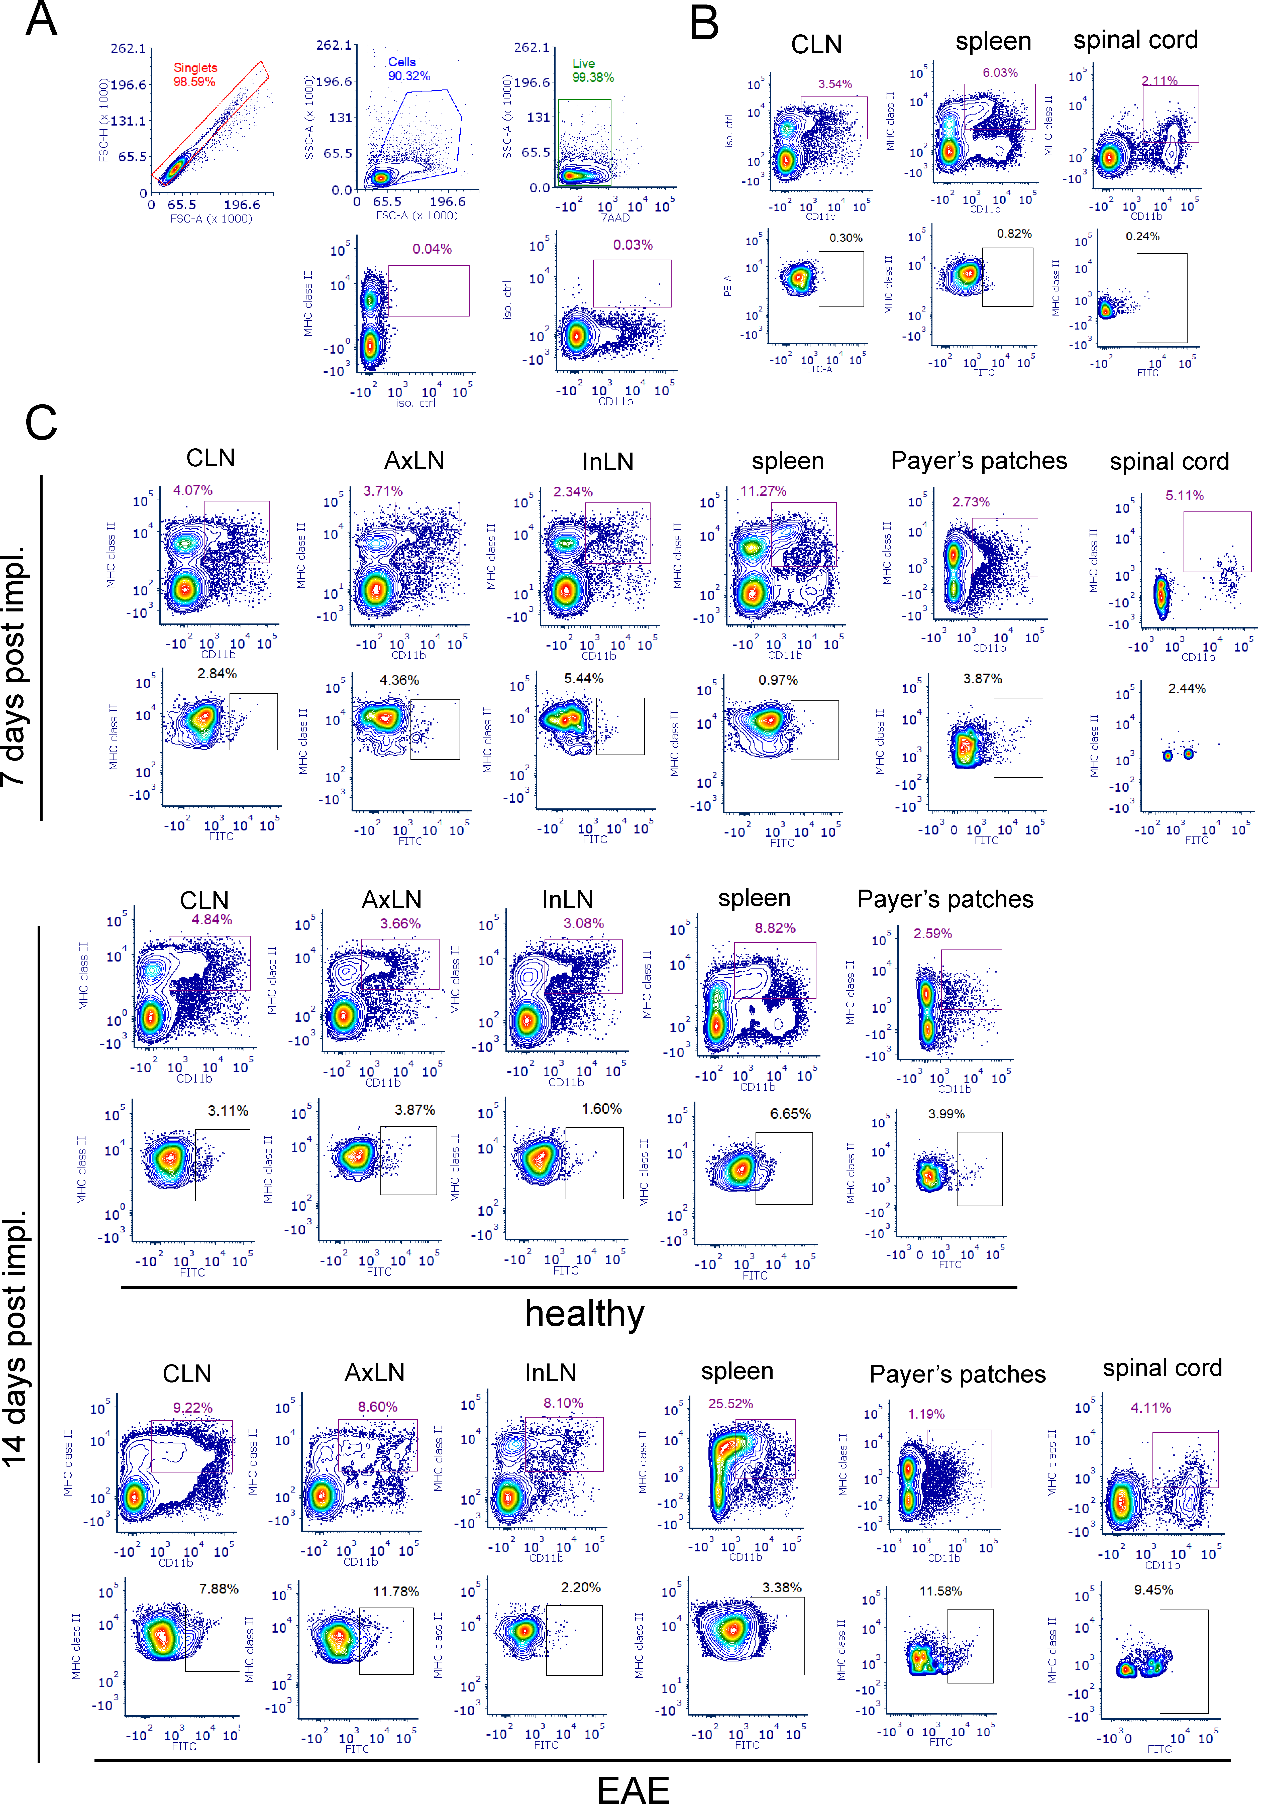


**Supplementary Figure S2. In vivo tracking of ESL1-FITC release from PLGA.** ESL1-FTIC was monitored in vivo within myeloid (CD11b+I-A+) cells isolated from cervical, axillar, inguinal lymph nodes, spleen, Payer’s patches and spinal cord. The organs were collected either 7 days after the implantation, or 14 days after the implantation in immunised (EAE) or non-immunized (healthy) animals, as described. **A)** Astandard gating strategy for monitoring ESL1-FITC within myeloid cells is shown, in which single live cells were gated, and the specific CD11b+ MHC class II (I-A) region were defined according to FMO controls with isotype Abs staining. **B)** Control samples of Cervical lymph nodes (CLN), spleen and spinal cord are shown, after the isolation form animals implanted with non-labelled ESL1-FITC and immunised for EAE, 7 days before the organs collection (14 days after the implantation). This strategy was used to determine specific detection of ESL1-FITC within myeloid (CD11b+I-A+ cells). **C)** A representative data on each organ collected either 7 days after the implantation, or 14 days after the implantation in immunised or non-immunised (healthy) animals. The number of spinal cord cells from non-immunized animals was too low for reliable analysis, as demonstrated in samples collected on day 7 post implantation.


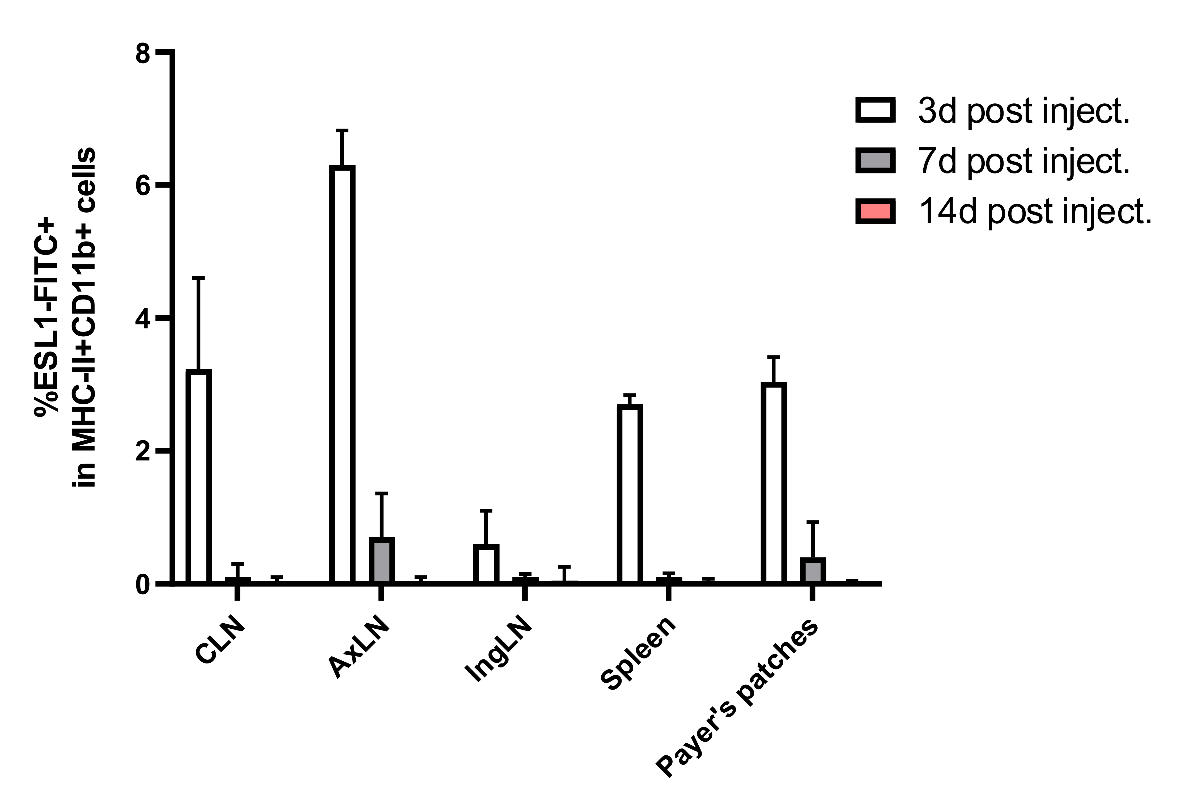


**Supplementary Figure S3. In vivo tracking of free ESL1-FITC.** ESL1-FTIC or non-labelled ESL1 (both at 350 μg/ 200 μl/ animal) were injected subcutaneously into suprascapular region and after 3, 7, or 14 days. The presence of ESL1-FITC was monitored in vivo within myeloid (CD11b+I-A+) cells isolated from cervical (CLN), axillar (AxLN), inguinal lymph nodes (IngLN), spleen and Payer’s patches in comparison to control ESL1-treated animals. The gating strategy for the analysis is shown in Supplementary Figure S2.


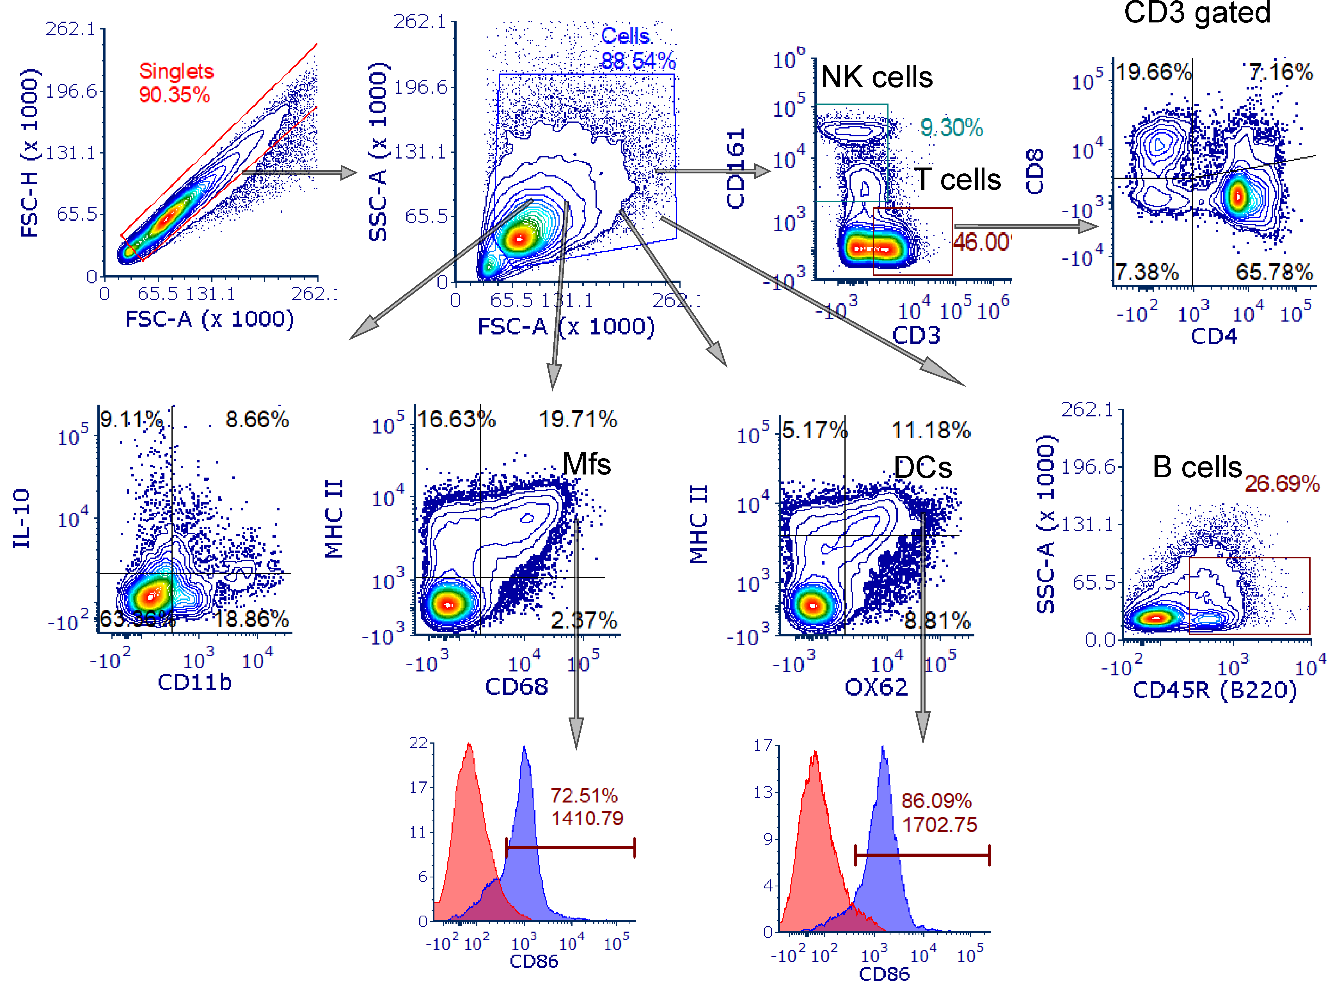


**Supplementary Figure S4. Gating strategy for immune cell analysis in EAE.** A representative analysis of the splenocytes isolated at the EAE peak is shown. Upon exclusion of doublets and dead cells (not shown), all leukocytes were analysed for % of NK (C161+CD3-), T cells (CD161-CD3+), CD4+T cells (CD3+CD4+CD8-), CD8+ T cells (CD3+CD4-CD8+), B cells (CD45R+), DCs (MHC class II (I-A)highOX62+) and macrophages (MHC class II(I-A)+ CD68+). The expression of CD86 (blue histograms) was analysed within the population of macrophages and dendritic cells, according to FMO controls (red histograms). A representative analysis of IL-10-production within total myeloid (CD11b+) cells is shown. A similar gating strategy within CD45+ cells was used for the analysis of immune cells in the spinal cords.


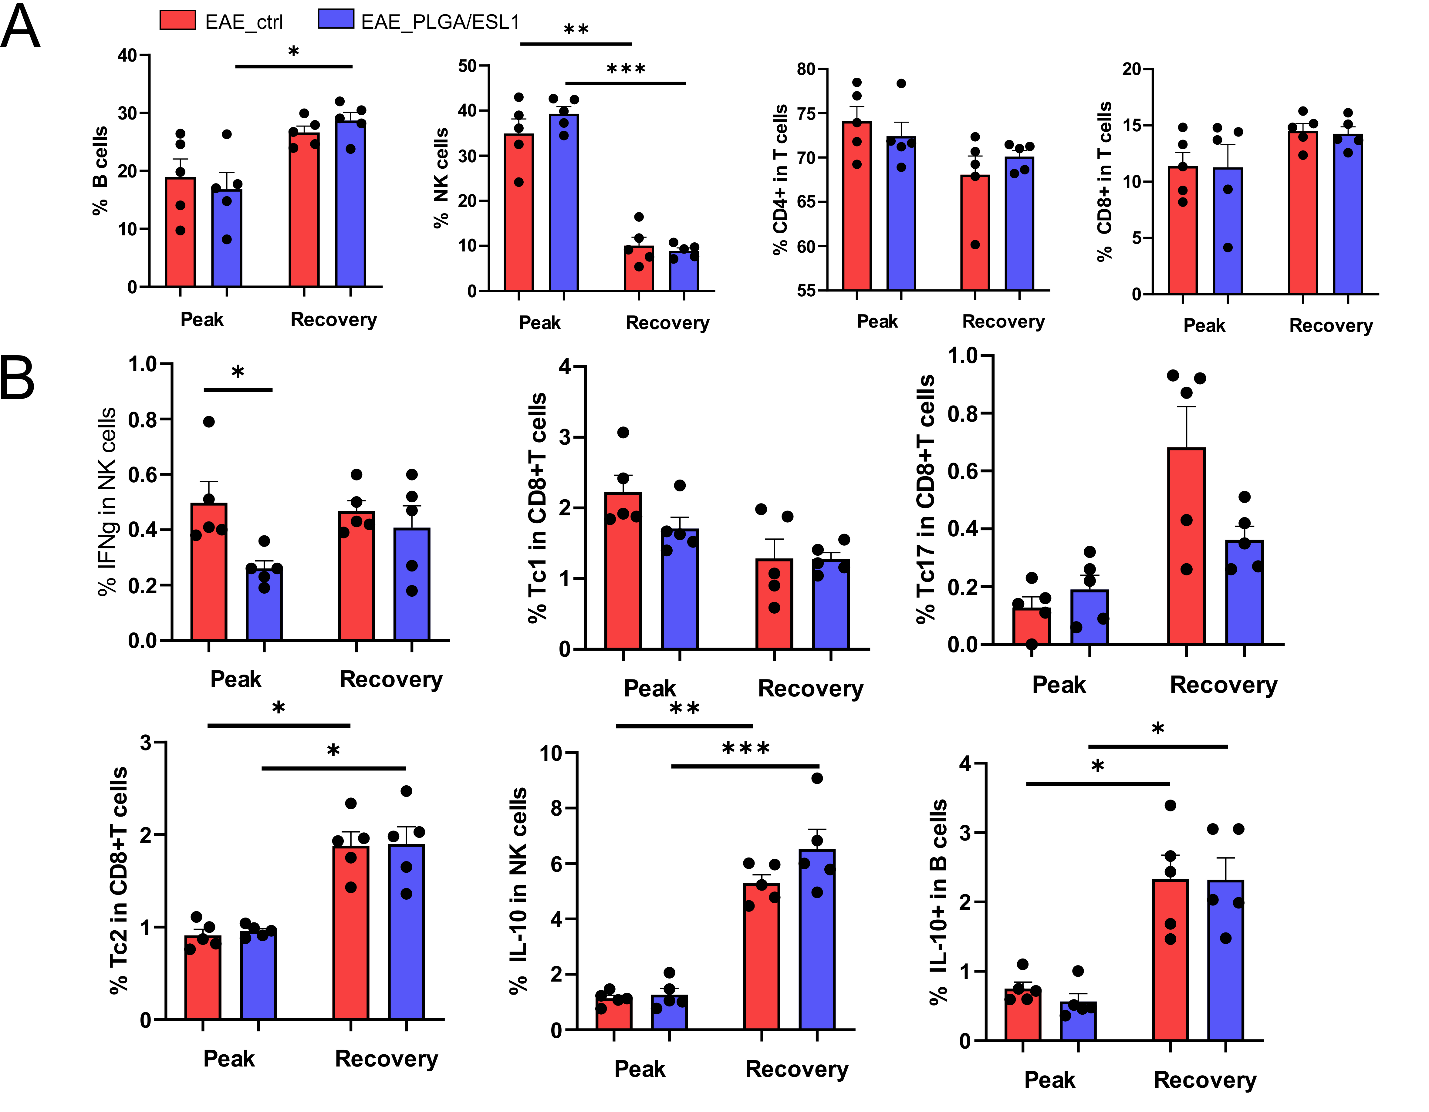


**Supplementary Figure S5. Immune cell subsets in the spleen during EAE.** DA rats were implanted with PLGA/ESL1 (350µg ESL1 / 7 cm2 PLGA) subcutaneously (EAE_PLGA/ESL1), or just sham-operated (EAE_ctrl), and after 7 days immunised with spinal cord homogenate in CFA. Splenocytes were collected from animals at the peak of EAE (day 14), or in the recovery phase (day 20), and analysed by flow cytometry. **A)** The proportions of B cells, CD4+T cells and CD8+T cells are shown after surface staining. **B)** The proportions of IFN-γ+ (Tc1) or IL-4+ (Tc2) CD8+ T cells are shown, as well as IL-10+ NK (CD161+CD3-) and IL-10+ B cells, upon the isolation and activation with PMA/ Ca Ionophore/ Monensin, as described in Materials and Methods. *p<0.05, ** p<0.001, ***p<0.005, as indicated (Kruskal-Wallis test with Dunn’s multiple comparison test).


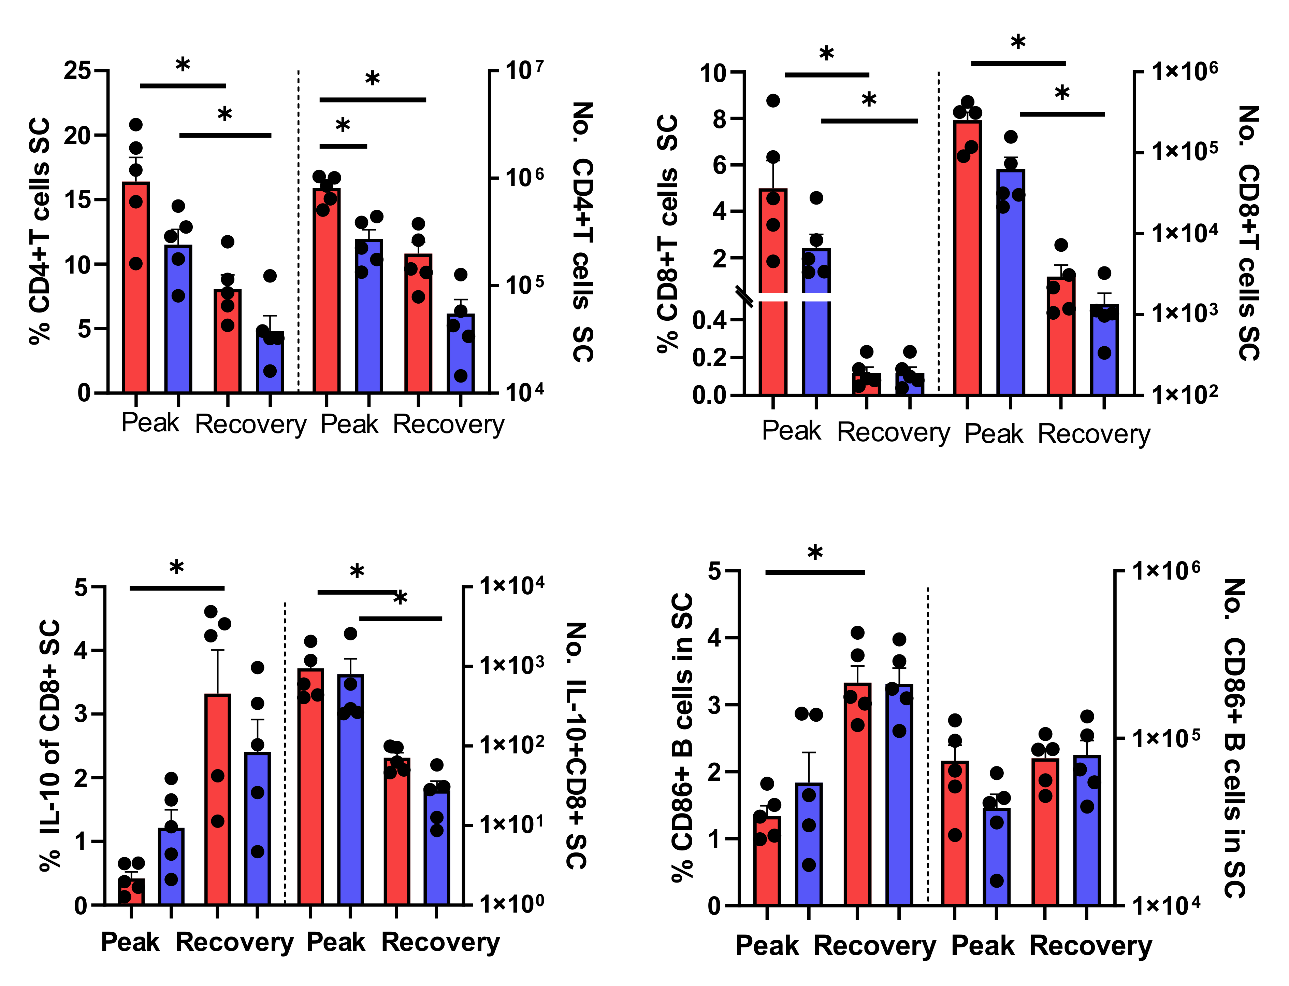


**Supplementary Figure S6. Immune cell subsets in the spinal cord during EAE.** DA rats were implanted with PLGA/ESL1 (350µg ESL1 / 7 cm2 PLGA) subcutaneously (EAE_PLGA/ESL1), or just sham-operated (EAE_ctrl), and after 7 days immunised with spinal cord homogenate in CFA. Spinal cords were collected from animals at the peak of EAE (day 14), or in the recovery phase (day 20), and analysed by flow cytometry. The proportions and the number of total CD4+ and CD8+ T cell, as well as IL-10+-producing CD8+T cells and CD86-expressing B cells in SCs are shown. *p<0.05, as indicated (Kruskal-Wallis test with Dunn’s multiple comparison test).

**Supplementary reference**

1. Song X, Sun X, Oh SF, et al. Microbial bile acid metabolites modulate gut RORγ+ regulatory T cell homeostasis. *Nature*. 2020;577(7790):410-415. doi:10.1038/s41586-019-1865-0
